# Supplementary material
Source: PubMed Central journal article supplement (PMC7042905)
Supplement: jamaophthalmol-138-294-s001.pdf [file jamaophthalmol-138-294-s001.pdf]

## Supplementary Online Content

Simcoe MJ, Weisschuh N, Wissinger B, Hysi PG, Hammond CJ. Genetic heritability of pigmentary glaucoma and associations with other eye phenotypes. *JAMA Ophthalmol*. Published online January 30, 2020. doi:10.1001/jamaophthalmol.2019.5961

**eFigure 1.** Plot of the first and second principal components.

**eFigure 2.** Plot of the first and third principal components.

**eFigure 3.** Plot of the second and third principal components.

**eTable 1.** Mendelian Randomisation results for eye colour and pigmentary glaucoma.

**eTable 2.** Mendelian Randomisation results for intraocular pressure and pigmentary glaucoma.

This supplementary material has been provided by the authors to give readers additional information about their work.

**eFigure 1. Plot of the first and second principal components.**

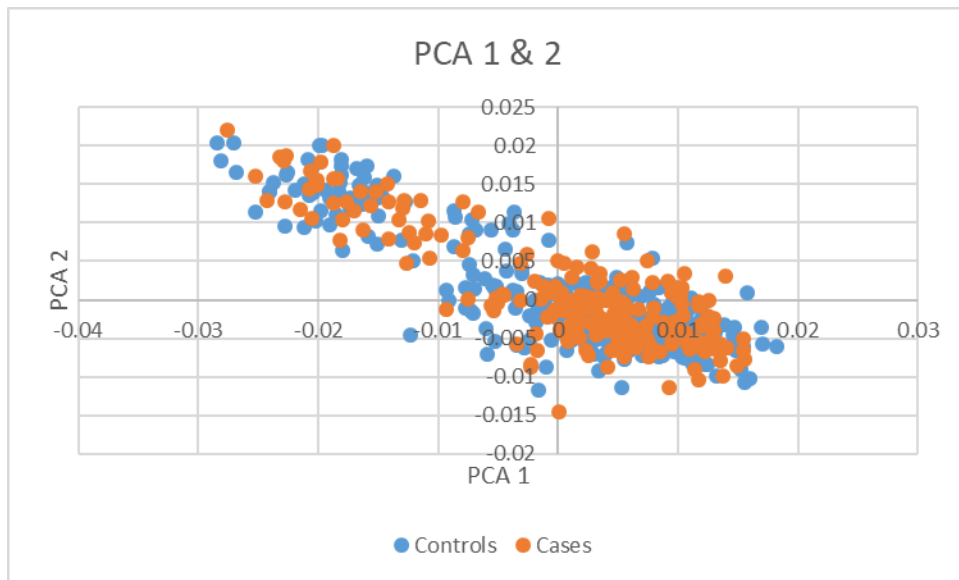

**eFigure 2. Plot of the first and third principal components.**

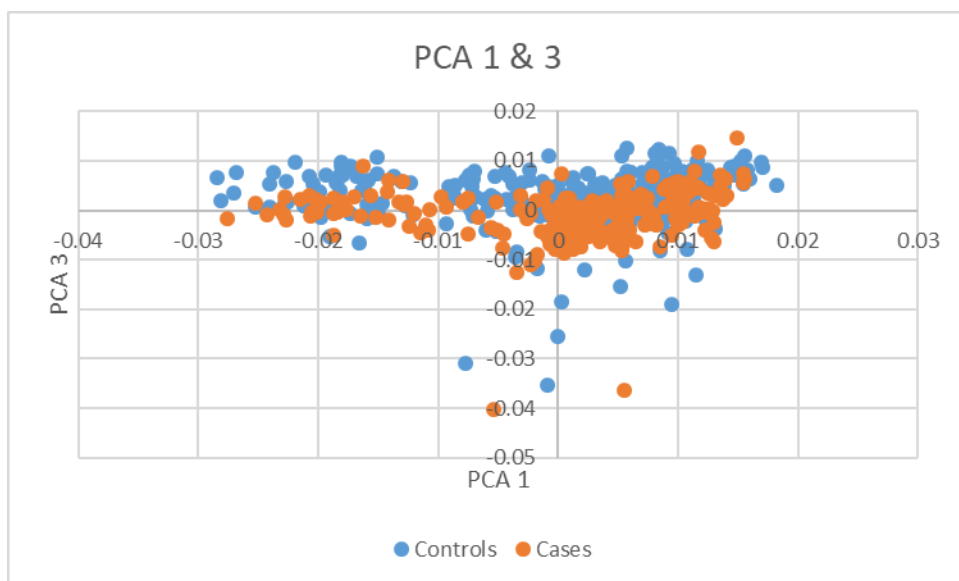

**eFigure 3. Plot of the second and third principal components.**

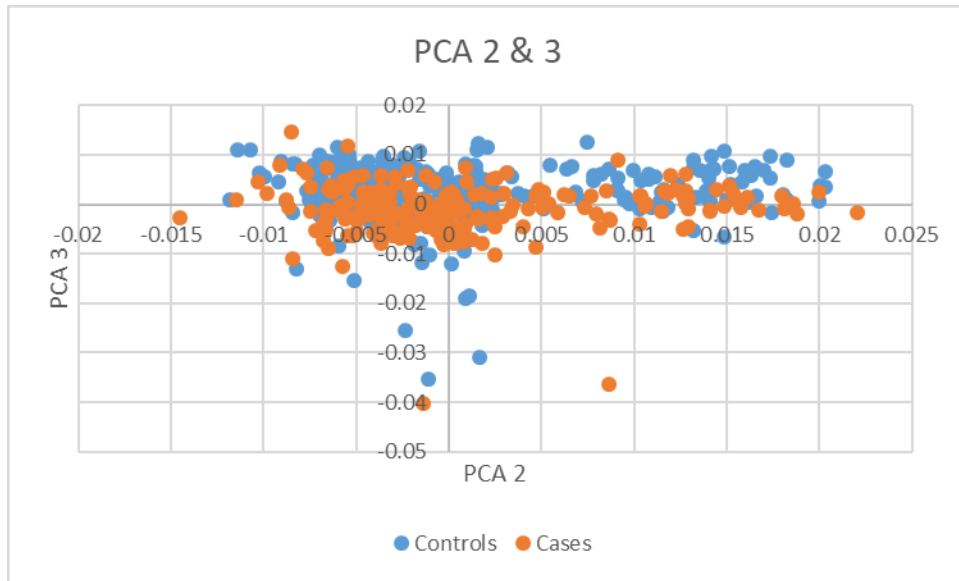

**eTable 1. Mendelian Randomisation results for eye colour and pigmentary glaucoma**

| Method                    | Estimate | Standard Error | Lower 95% CI | Upper 95% CI | P-Value |
|---------------------------|----------|----------------|--------------|--------------|---------|
| Simple median             | -0.368   | 0.929          | -2.19        | 1.453        | 0.692   |
| Weighted median           | -0.539   | 0.542          | -1.601       | 0.523        | 0.32    |
| Penalized weighted median | -0.535   | 0.541          | -1.595       | 0.525        | 0.323   |
|                           |          |                |              |              |         |
| IVW                       | -0.585   | 0.71           | -1.978       | 0.807        | 0.41    |
| Penalized IVW             | -0.585   | 0.71           | -1.978       | 0.807        | 0.41    |
| Robust IVW                | -0.564   | 0.267          | -1.086       | -0.042       | 0.034   |
| Penalized robust IVW      | -0.564   | 0.267          | -1.086       | -0.042       | 0.034   |
|                           |          |                |              |              |         |
| MR-Egger                  | -1.154   | 1.01           | -3.134       | 0.826        | 0.253   |
| (intercept)               | 0.14     | 0.175          | -0.202       | 0.483        | 0.421   |
| Penalized MR-Egger        | -1.185   | 0.988          | -3.122       | 0.751        | 0.23    |
| (intercept)               | 0.155    | 0.172          | -0.182       | 0.491        | 0.367   |
| Robust MR-Egger           | -1.242   | 0.658          | -2.531       | 0.047        | 0.059   |
| (intercept)               | 0.202    | 0.274          | -0.335       | 0.738        | 0.461   |
| Penalized robust MR-Egger | -1.254   | 0.607          | -2.443       | -0.065       | 0.039   |
| (intercept)               | 0.207    | 0.25           | -0.282       | 0.696        | 0.407   |

**eTable 2. Mendelian Randomisation results for intraocular pressure and pigmentary glaucoma**

| Method                    | Estimate | Standard Error | Lower 95% CI | Upper 95% CI | P-Value |
|---------------------------|----------|----------------|--------------|--------------|---------|
| Simple median             | 0.284    | 0.281          | -0.266       | 0.834        | 0.312   |
| Weighted median           | 0.493    | 0.288          | -0.072       | 1.057        | 0.087   |
| Penalized weighted median | 0.503    | 0.288          | -0.062       | 1.068        | 0.081   |
|                           |          |                |              |              |         |
| IVW                       | 0.362    | 0.188          | -0.007       | 0.731        | 0.055   |
| Penalized IVW             | 0.362    | 0.188          | -0.007       | 0.731        | 0.055   |
| Robust IVW                | 0.393    | 0.162          | 0.076        | 0.71         | 0.015   |
| Penalized robust IVW      | 0.393    | 0.162          | 0.076        | 0.71         | 0.015   |
|                           |          |                |              |              |         |
| MR-Egger                  | 0.476    | 0.489          | -0.482       | 1.434        | 0.33    |
| (intercept)               | -0.015   | 0.06           | -0.132       | 0.102        | 0.8     |
| Penalized MR-Egger        | 0.476    | 0.489          | -0.482       | 1.434        | 0.33    |
| (intercept)               | -0.015   | 0.06           | -0.132       | 0.102        | 0.8     |
| Robust MR-Egger           | 0.479    | 0.371          | -0.249       | 1.206        | 0.197   |
| (intercept)               | -0.012   | 0.055          | -0.119       | 0.096        | 0.83    |
| Penalized robust MR-Egger | 0.479    | 0.371          | -0.249       | 1.206        | 0.197   |
| (intercept)               | -0.012   | 0.055          | -0.119       | 0.096        | 0.83    |
